# Supplementary material
Source: publisher site journal article supplement (https://www.dovepress.com/article/608153)
Supplement: Supplementary file 1 [file 608153%20Supplementary%20Information.docx]

**Supplementary Information**

**Table S1** Baseline Characteristics

|  | **Single agent (n=45)** | **Platinum combination (n=26)** |
| --- | --- | --- |
| Median age, years (SD) | 62.6 (10.5) | 59.6 (10.6) |
| Age ≥ 65 years, n (%) | 19 (42.2) | 10 (38.5) |
| Sex, n (%)  Male  Female | 26 (57.8)  19 (42.2) | 11 (42.3)  15 (57.7) |
| ECOG PS, n (%)  0-1  ≥ 2 | 37 (82.2)  8 (17.8) | 24 (92.3)  2 (7.7) |
| BMI, n (%)  < 18.5 kg/m2  18.5–22.9 kg/m2  ≥ 23 kg/m2 | 10 (22.2)  21 (46.7)  14 (31.1) | 6 (23.0)  10 (38.5)  10 (38.5) |
| Comorbidity, n (%)  Diabetes mellitus  Hypertension  Chronic kidney disease  Cerebrovascular disease  Coronary artery disease | 18 (40.0)  12 (26.7)  6 (13.3)  3 (6.7)  2 (4.4)  1 (2.2) | 10 (38.5)  3 (11.5)  13 (18.3)  5 (7.0)  3 (4.2)  5 (7.0) |
| Laboratory at cancer diagnosis  Hemoglobin, g/dL (SD)  Albumin, g/dL (SD)  CEA, ng/mL (IQR)  CA 19-9, U/mL (IQR) | 11.8 (2)  4.1 (3.6, 4.3)  7.2 (2.5, 18.1)  116.5 (26.2, 952.2) | 11.1 (2.5)  4.0 (3.6, 4.3)  3.3 (2.1, 4.4)  29.8 (6.3, 150.4) |
| Tumor differentiation, n (%)  Well differentiated  Moderately differentiated  Poorly differentiated | 28 (62.2)  15 (33.3)  2 (4.4) | 13 (50.0)  9 (34.6)  4 (15.4) |
| T stage, n (%)  T1  T2  T3  T4 | 1 (2.2)  5 (11.1)  37 (82.2)  2 (4.4) | 0 (0)  2 (7.7)  21 (80.8)  3 (11.5) |
| N stage, n (%)  N0  N1  N2  N3 | 21 (46.7)  15 (33.3)  8 (17.8)  1 (2.2) | 10 (38.5)  8 (30.8)  7 (26.9)  1 (3.8) |
| Metastasis  Recurrent  De novo | 33 (73.3)  12 (26.7) | 17 (65.4)  9 (34.6) |
| Number of organ metastasis  1  ≥ 2 | 26 (57.8)  19 (42.2) | 16 (61.5)  10 (38.5) |
| Organ metastasis  Liver  Lung  Distant lymph node  Pancreas  Peritoneal  Pleura  Bone  Brain  Adrenal  Ovary | 26 (57.8)  11 (24.4)  22 (48.9)  4 (8.9)  2 (4.4)  1 (2.2)  4 (8.9)  1 (2.2)  2 (4.4)  1 (2.2) | 14 (53.8)  7 (26.9)  12 (46.2)  1 (3.8)  2 (7.7)  0 (0)  0 (0)  0 (0)  0 (0)  1 (3.8) |

ECOG, Eastern Cooperative Oncology Group; PS, performance status; BMI, body mass index; SD, standard deviation; IQR, interquartile range; COPD, chronic obstructive pulmonary disease; CEA, carcinoembryonic antigen; CA19-9, cancer antigen 19-9.

**Table S2** Treatment information

|  | **Chemotherapy** | |
| --- | --- | --- |
|  | **Fluoropyrimidine-based (n=28)** | **Gemcitabine-based (n=43)** |
| Second line chemotherapy, n (%)  5-FU  Capecitabine  TS-one  Carboplatin plus 5-FU  CAPOX  FOLFOX  FOLFIRI  Gemcitabine  Carboplatin plus gemcitabine  Cisplatin plus gemcitabine  Carboplatin plus etoposide  Cisplatin plus etoposide | 9 (32.1)  -  -  -  -  -  -  1 (3.6)  4 (14.3)  2 (7.1)  1 (3.6)  -  1 (3.6) | 23 (53.5)  6 (14.0)  2 (4.7)  1 (1.4)  3 (7.0)  1 (2.3)  8 (18.6)  -  1 (2.3)  -  -  1 (2.3)  - |
| Third line chemotherapy, n (%)  5-FU  TS-1  FOLFOX  FOLFIRI | 2 (7.1)  -  1 (3.6)  1 (3.6)  - | 5 (11.6)  1 (2.3)  -  1 (2.3)  3 (7.0) |
| Fourth line chemotherapy, n (%)  FOLFIRI | 1 (3.6)  1 (3.6) | 1 (2.3)  1 (2.3) |

5-FU: 5-fluorouracil; FOLFOX: 5-fluorouracil plus folinic acid and oxaliplatin; FOLFIRI: 5-fluorouracil plus folinic acid and irinotecan.

**Figure S1** Median OS between patients who underwent metastasectomy and those without metastasectomy.

***
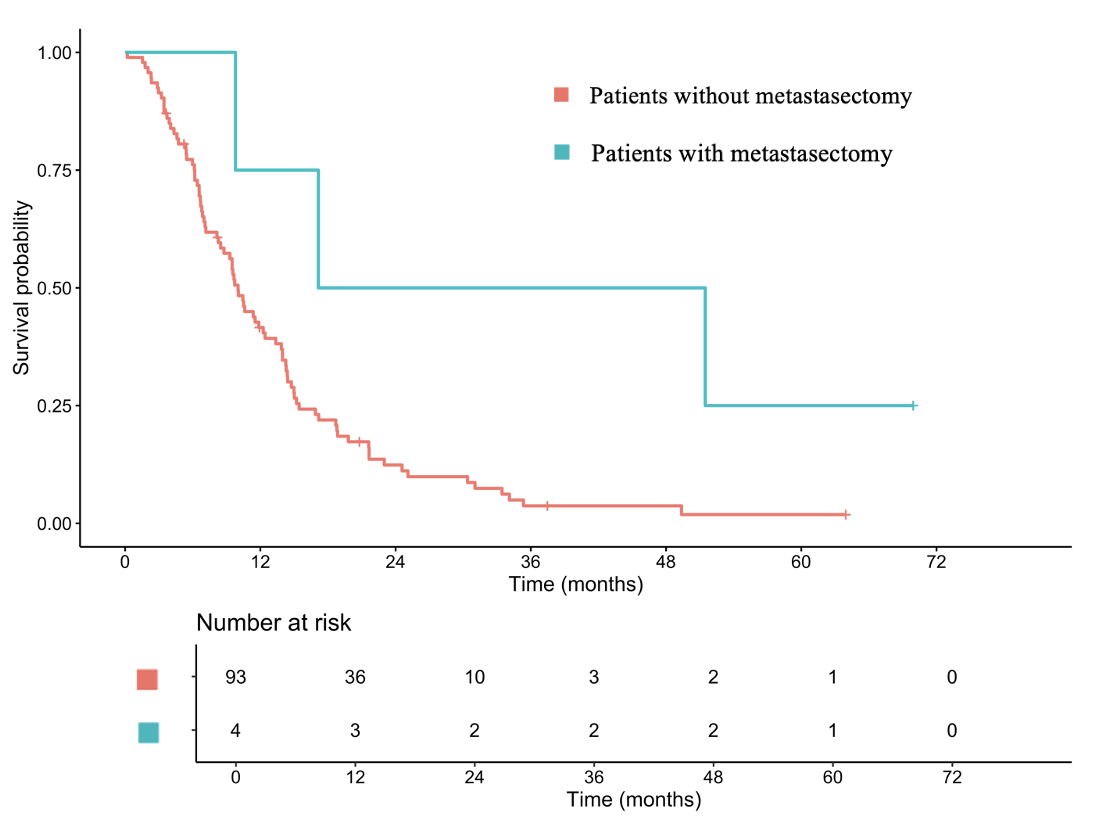
***

**Figure S2.** Median PFS between patients with patients who received fluoropyrimidine-based chemotherapy and gemcitabine-based chemotherapy

**
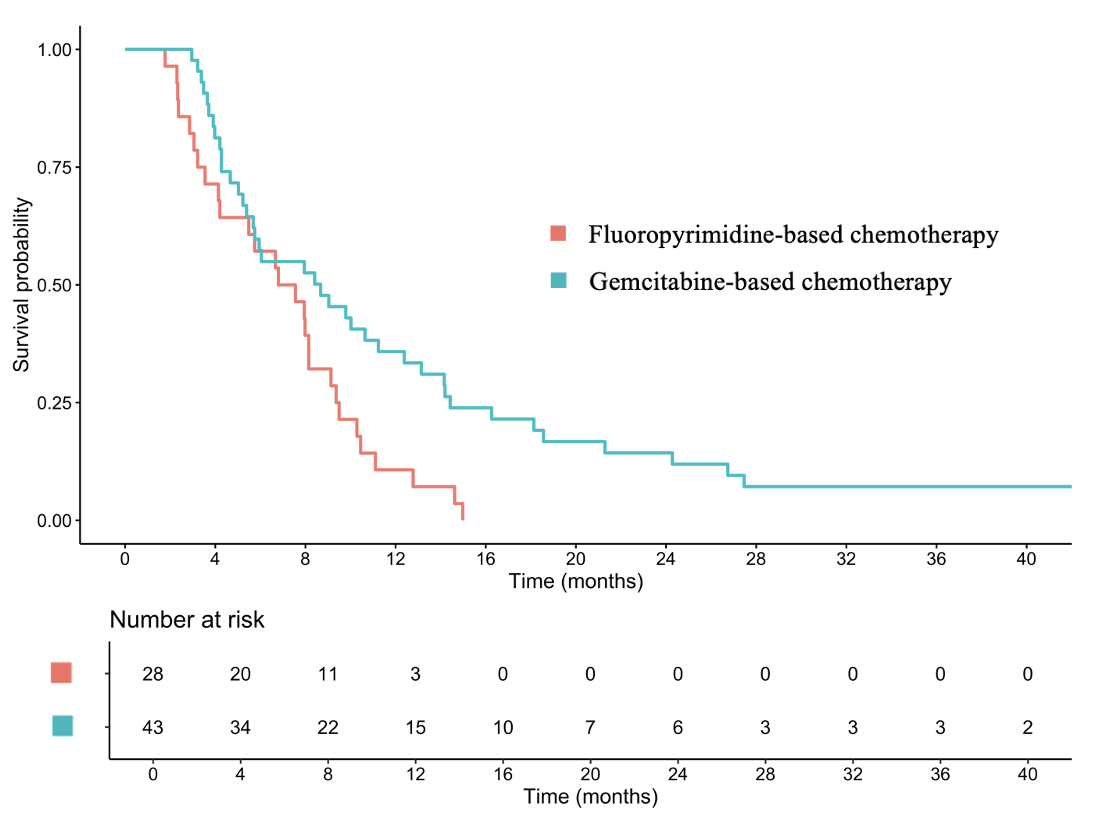
**

**Figure S3.** Median PFS between patients who received monotherapy chemotherapy and platinum combined chemotherapy

**
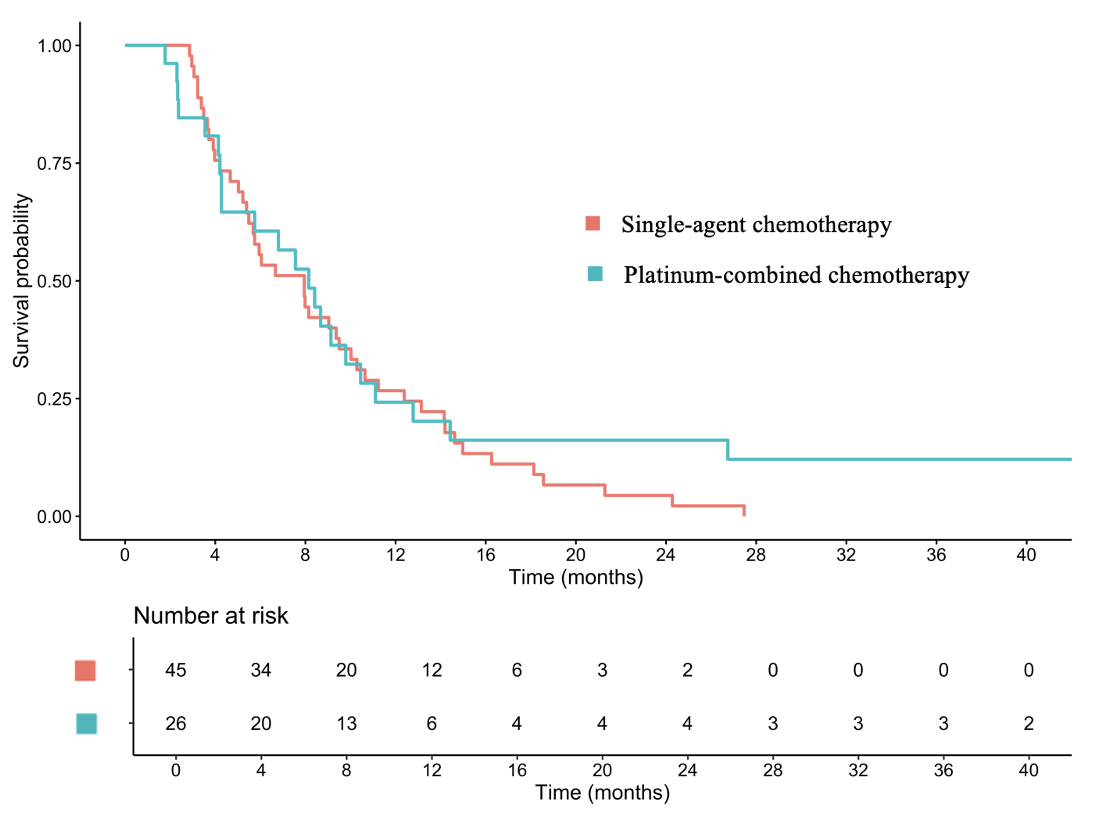
**
